# Supplementary material for: Epitope-engineered human hematopoietic stem cells are shielded from CD123-targeted immunotherapy
Source: PubMed Central journal article supplement (PMC10541312; doi:10.1084/jem.20231235), 2023-09-29

Cropped sections

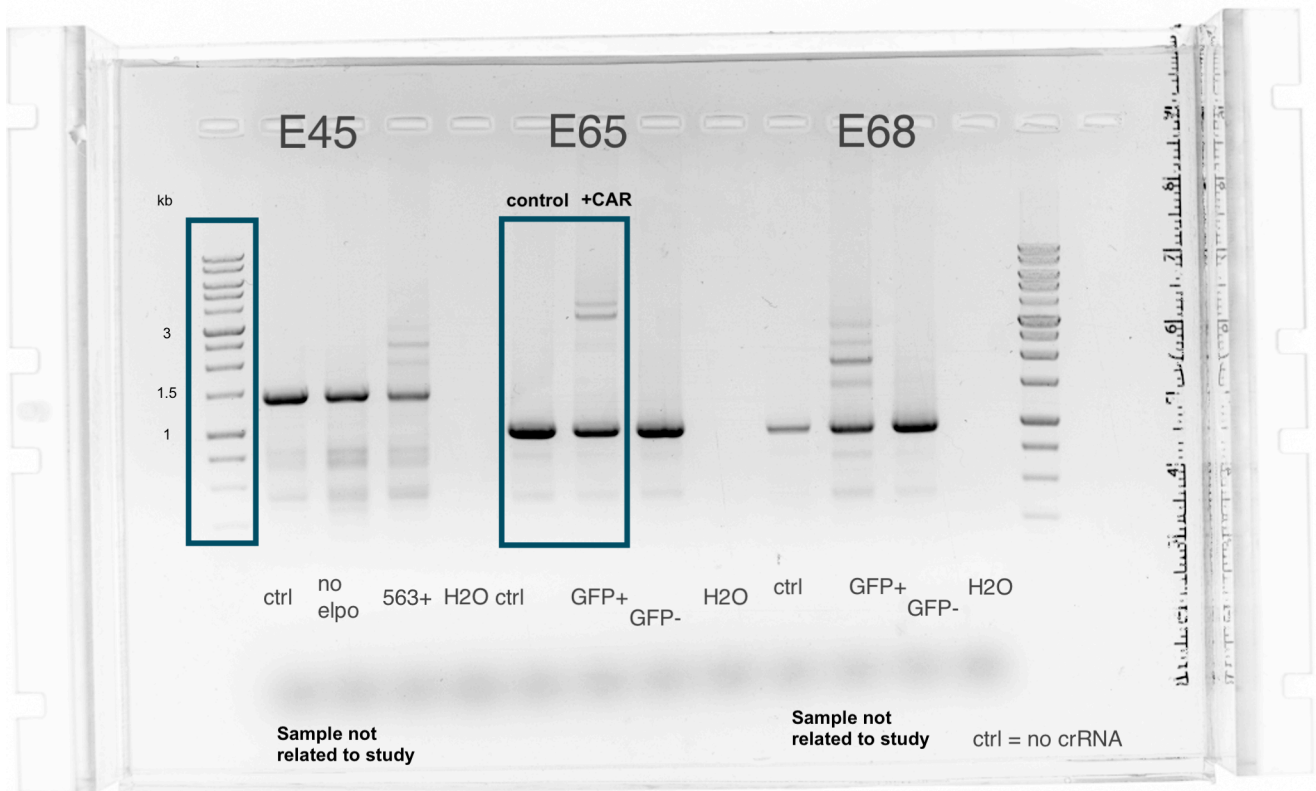

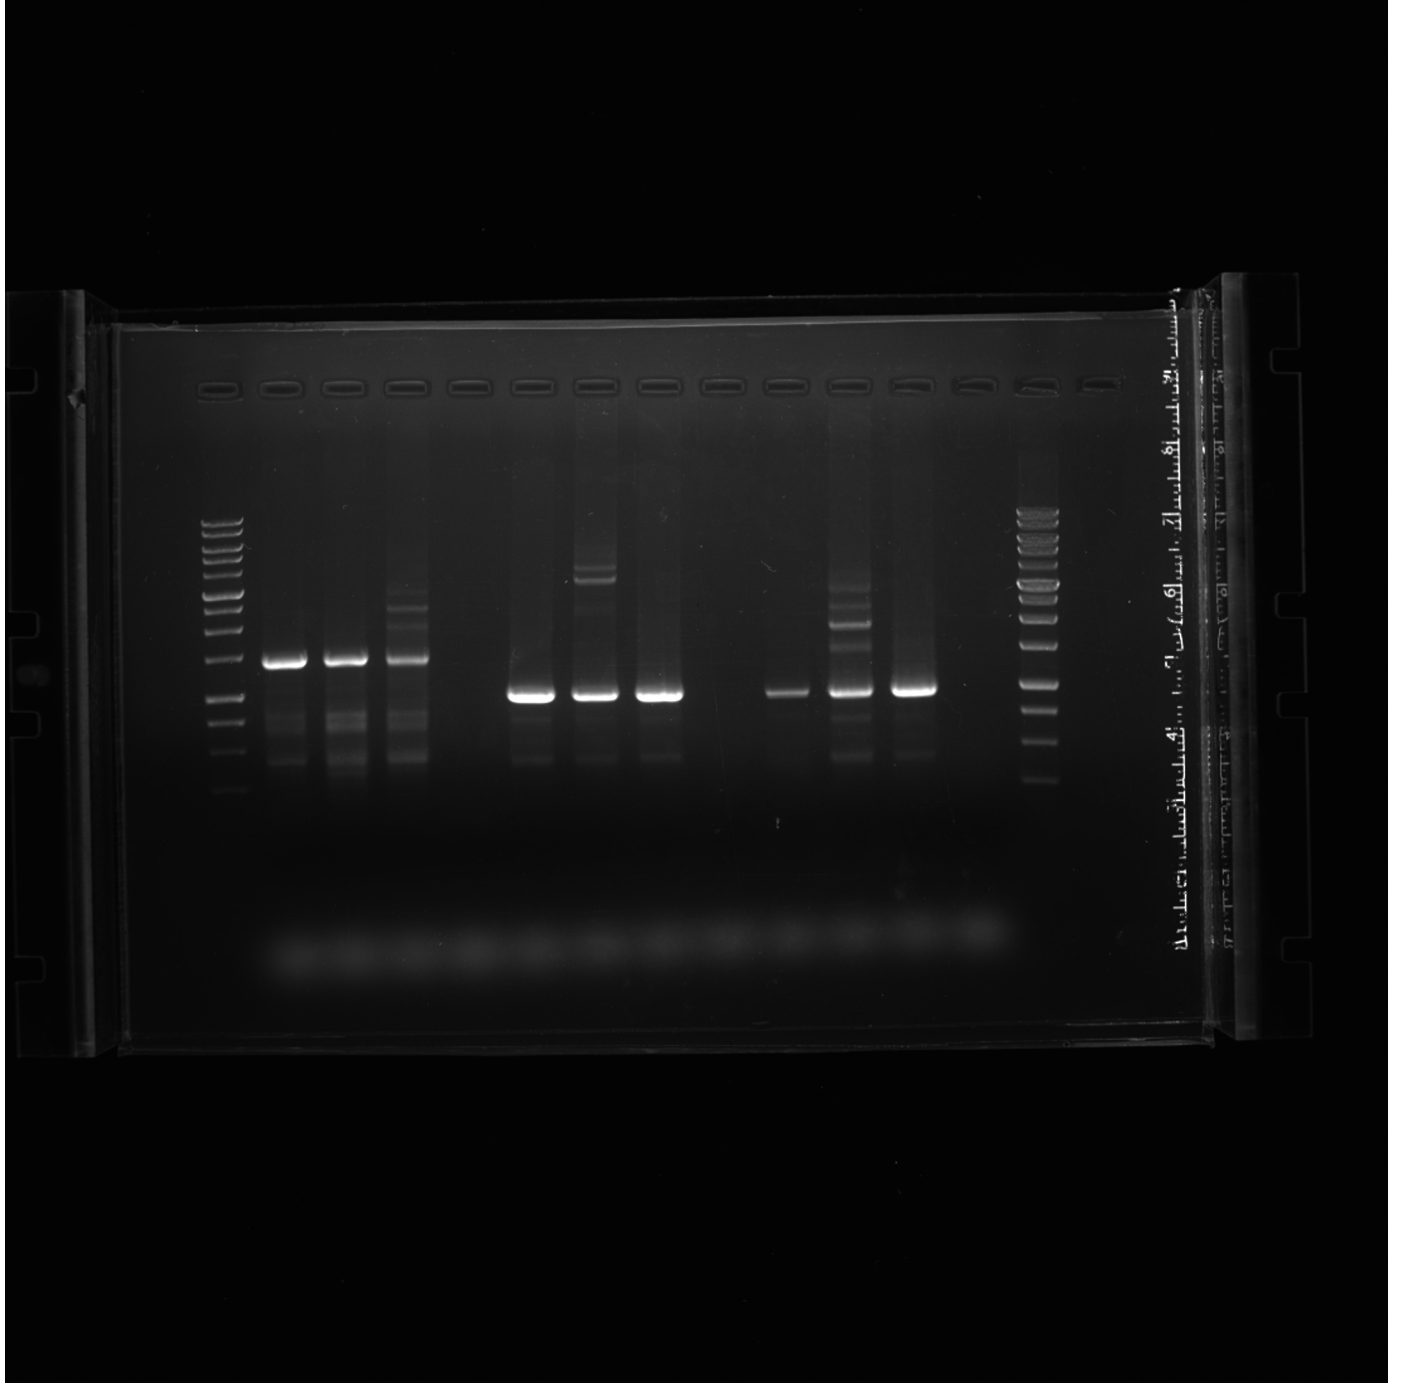

Supplement: JEM_20231235_SourceDataFS2.pdf [file JEM_20231235_SourceDataFS2.pdf]
